# Supplementary material for: Dispelling myths about rare disease registry system development
Source: Springer Nature journal article supplement (doi:10.1186/1751-0473-8-21), 2013-10-16

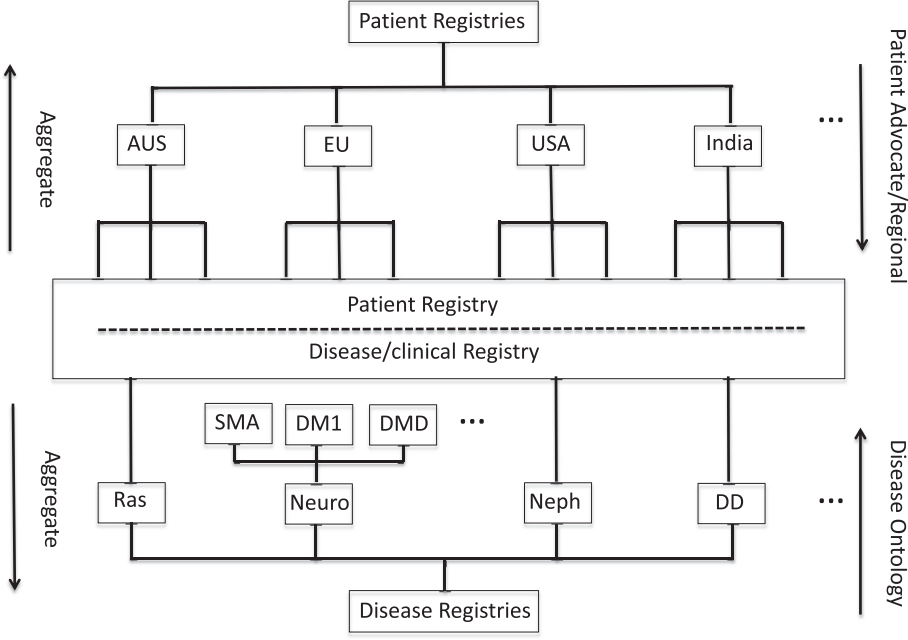

Supplement: 13029_2013_101_MOESM1_ESM.pdf [file 13029_2013_101_MOESM1_ESM.pdf]
